# Supplementary material
Source: Springer Nature journal article supplement (https://www.springermedizin.de/resource/supplementary/12885_2012_3786_MOESM4_ESM.pdf/9464460)

**A**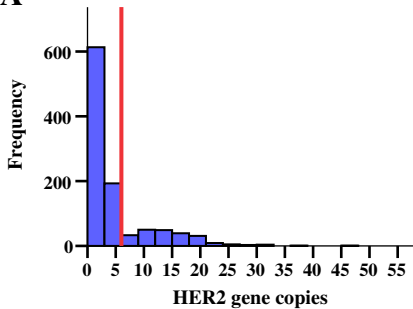**B**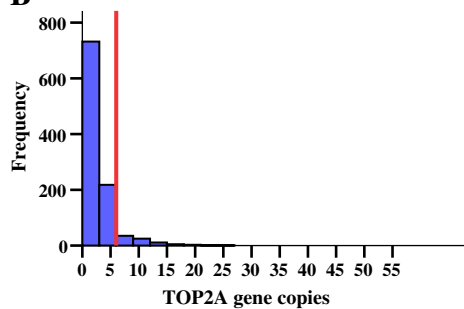**C**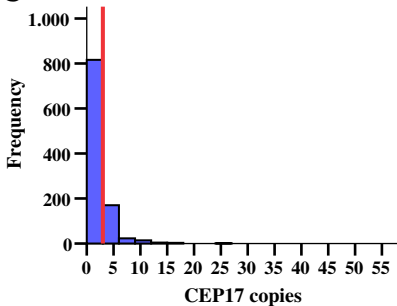

Supplement: MOESM4 [file 9464460]
